# Supplementary material for: Mesenchymal Stem Cell Transition to Tumor-Associated Fibroblasts Contributes to Fibrovascular Network Expansion and Tumor Progression
Source: PubMed Central journal article supplement (PMC2661372; doi:10.1371/journal.pone.0004992), 2009-04-07

# Supplemental Figure 3

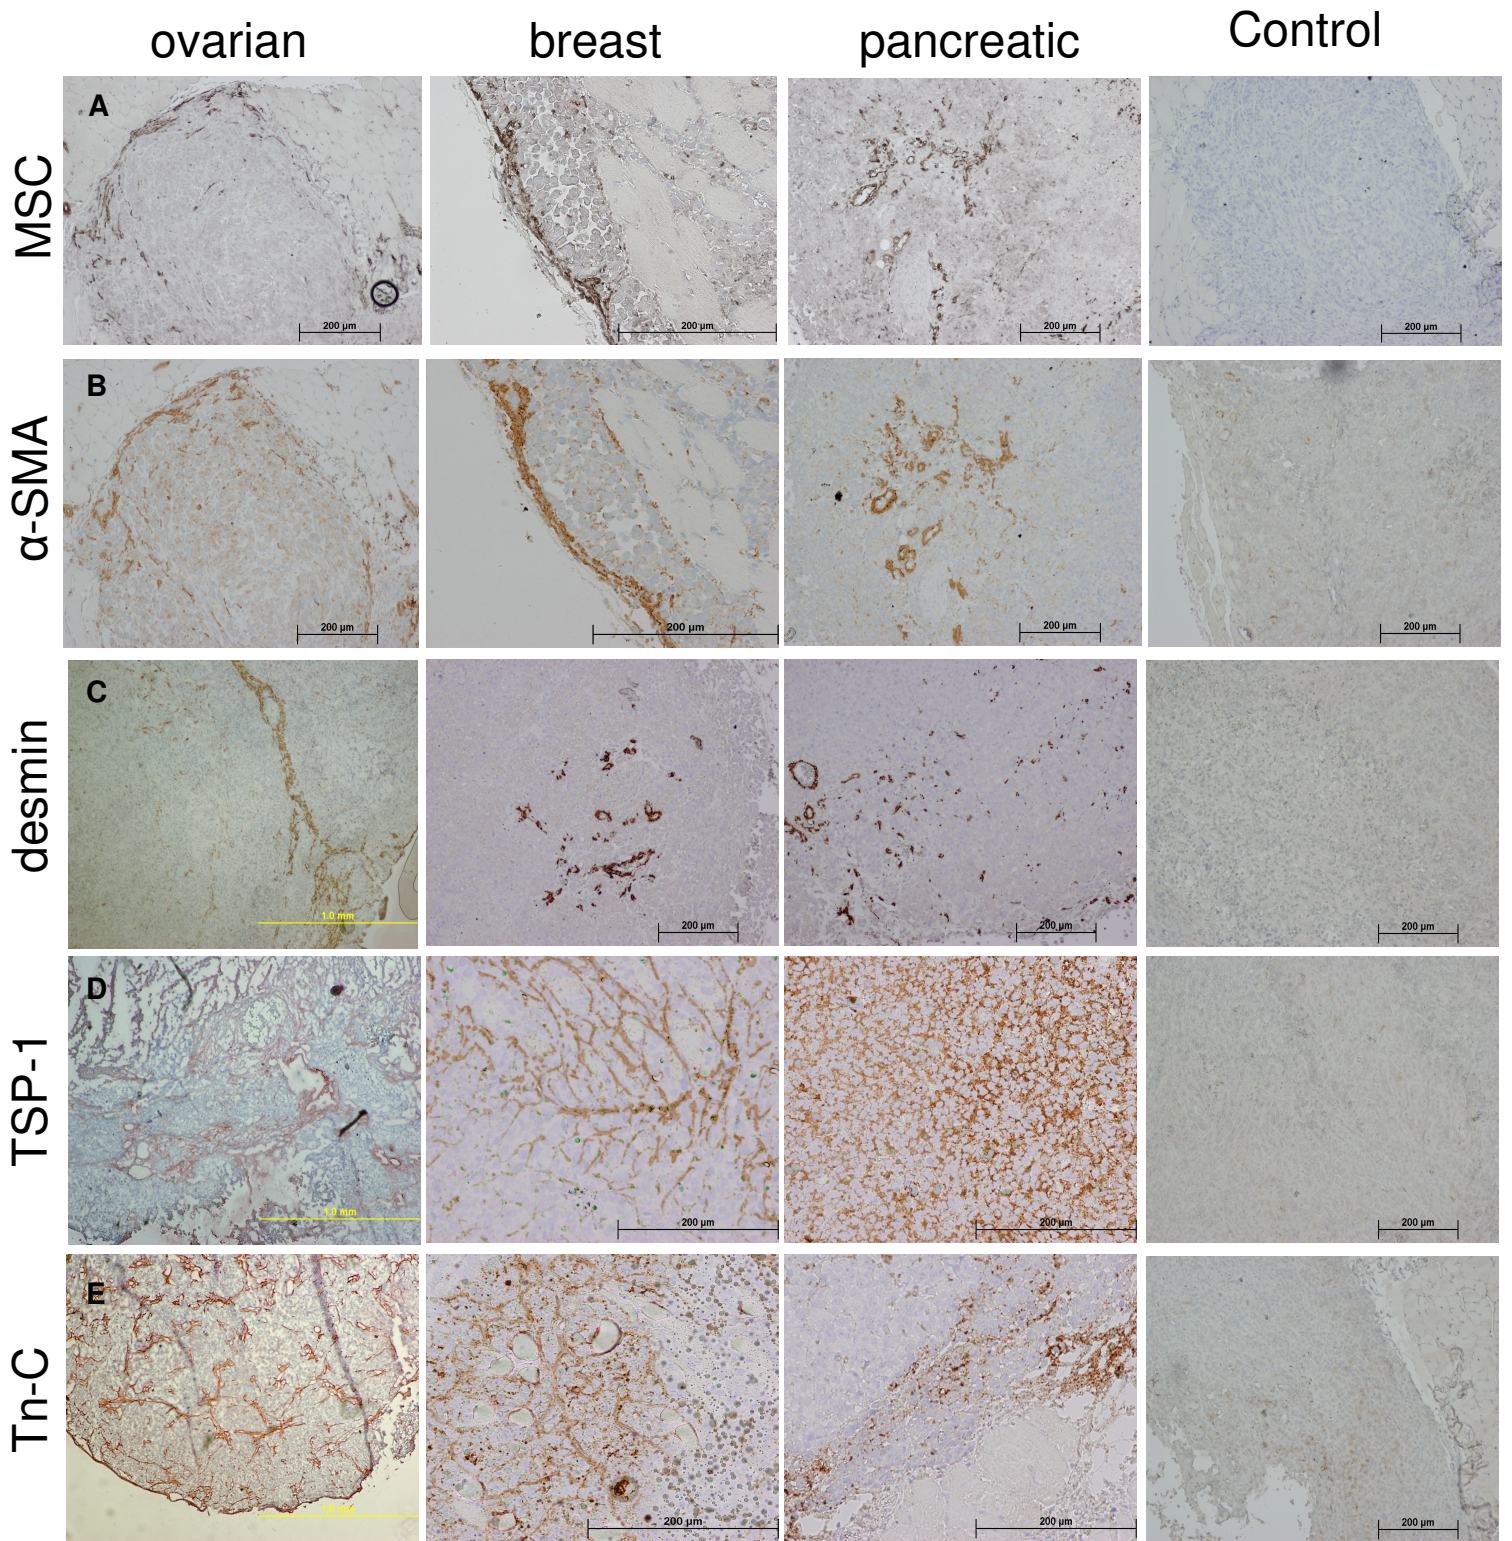

Supplement: pone.0004992.s003.pdf [file pone.0004992.s003.pdf]
